# Supplementary material for: Structure-function analysis of fission yeast cleavage and polyadenylation factor (CPF) subunit Ppn1 and its interactions with Dis2 and Swd22
Source: PubMed Central journal article supplement (PMC7990198; doi:10.1371/journal.pgen.1009452), 2021-03-12
Supplement: pgen.1009452.s001.pdf [file pgen.1009452.s001.pdf]

| Sample             | Total Paired Reads | Mapped Reads     |
|--------------------|--------------------|------------------|
| WT (1)             | 26,820,778         | 25,069,976 (93%) |
| WT (2)             | 26,799,612         | 24,896,074 (93%) |
| WT (3)             | 24,623,533         | 22,981,899 (93%) |
| <i>ppn1</i> Δ (1)  | 27,074,925         | 25,654,708 (95%) |
| <i>ppn1</i> Δ (2)  | 21,792,674         | 20,210,444 (93%) |
| <i>ppn1</i> Δ (3)  | 28,302,106         | 26,637,590 (94%) |
| <i>swd22</i> Δ (1) | 24,435,616         | 23,082,133 (94%) |
| <i>swd22</i> Δ (2) | 24,699,951         | 23,577,405 (95%) |
| <i>swd22</i> Δ (3) | 23,445,504         | 22,211,684 (95%) |
| <i>dis2</i> Δ (1)  | 26,747,724         | 25,468,701 (95%) |
| <i>dis2</i> Δ (2)  | 23,488,584         | 22,144,361 (94%) |
| <i>dis2</i> Δ (3)  | 24,673,733         | 23,340,878 (95%) |

S1 Fig. RNA-seq read counts for triplicate biological replicates.
