# Supplementary material for: Structure-function analysis of fission yeast cleavage and polyadenylation factor (CPF) subunit Ppn1 and its interactions with Dis2 and Swd22
Source: PubMed Central journal article supplement (PMC7990198; doi:10.1371/journal.pgen.1009452), 2021-03-12
Supplement: pgen.1009452.s002.pdf [file pgen.1009452.s002.pdf]

| Sample pairs                     | Pearson Coefficient |
|----------------------------------|---------------------|
| WT (1) vs (2)                    | 0.987               |
| WT (2) vs (3)                    | 0.987               |
| WT (1) vs (3)                    | 0.987               |
| <i>ppn1</i> $\Delta$ (1) vs (2)  | 0.985               |
| <i>ppn1</i> $\Delta$ (2) vs (3)  | 0.983               |
| <i>ppn1</i> $\Delta$ (1) vs (3)  | 0.988               |
| <i>swd22</i> $\Delta$ (1) vs (2) | 0.984               |
| <i>swd22</i> $\Delta$ (2) vs (3) | 0.983               |
| <i>swd22</i> $\Delta$ (1) vs (3) | 0.987               |
| <i>dis2</i> $\Delta$ (1) vs (2)  | 0.987               |
| <i>dis2</i> $\Delta$ (2) vs (3)  | 0.987               |
| <i>dis2</i> $\Delta$ (1) vs (3)  | 0.986               |

S2 Fig. RNA-seq data reproducibility between biological replicates.
