# Supplementary material for: Structure-function analysis of fission yeast cleavage and polyadenylation factor (CPF) subunit Ppn1 and its interactions with Dis2 and Swd22
Source: PubMed Central journal article supplement (PMC7990198; doi:10.1371/journal.pgen.1009452), 2021-03-12
Supplement: pgen.1009452.s003.pdf [file pgen.1009452.s003.pdf]

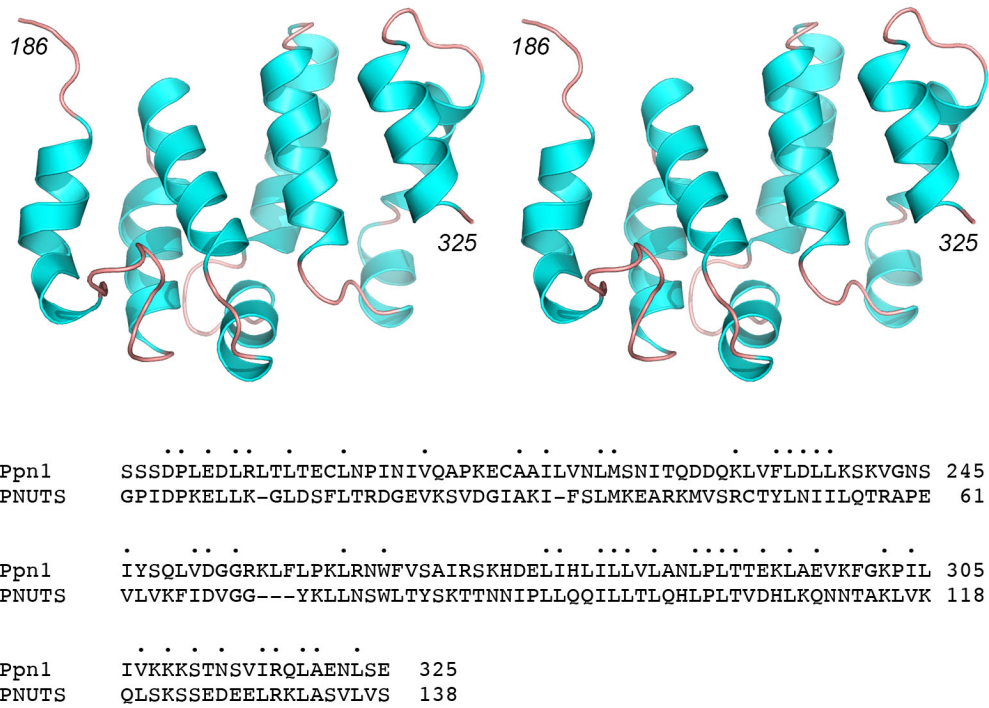

S3 Fig. Predicted structural homology of Ppn1-(186-325) to the TFIIS-like domain of PNUTS. (Top panel) Stereo view of the Phyre2 homology model of Ppn1 templated on the fold of the transcription elongation factor TFIIS-like N-terminal domain of rat PNUTS (pdb 6VTI). (Bottom panel) Primary structure alignment of the homologous TFIIS-like domains of Ppn1 and PNUTS generated by Phyre2. Positions of amino acids identity and sidechain similarity are denoted by • above the alignment.
