# Supplementary material for: Structure-function analysis of fission yeast cleavage and polyadenylation factor (CPF) subunit Ppn1 and its interactions with Dis2 and Swd22
Source: PubMed Central journal article supplement (PMC7990198; doi:10.1371/journal.pgen.1009452), 2021-03-12
Supplement: pgen.1009452.s004.pdf [file pgen.1009452.s004.pdf]

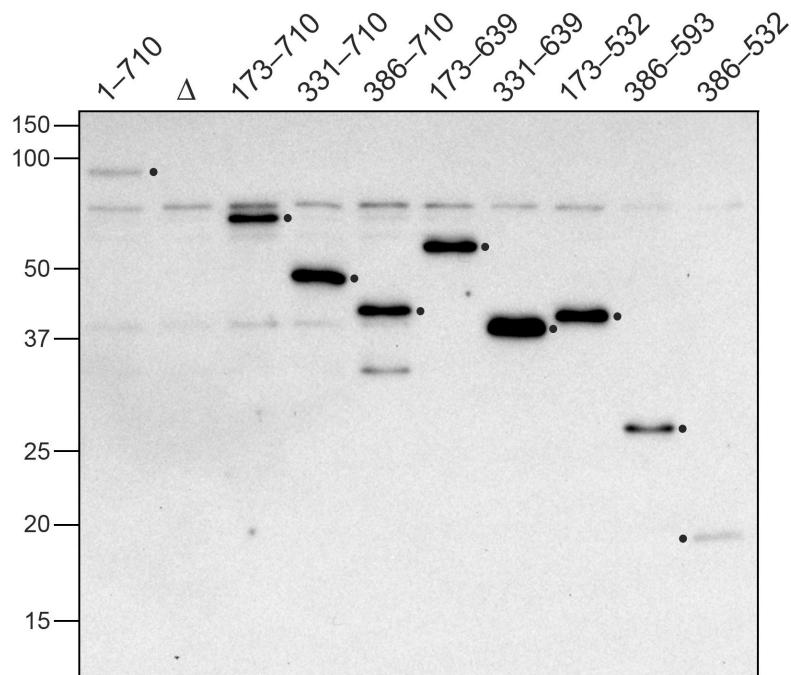

S4 Fig. Western blot of Ppn1 N-terminal truncation mutants. Whole-cell extracts from wild-type *ppn1*-(1-710), *ppn1*Δ, and the indicated *ppn1* truncation strains growing logarithmically at 30°C were resolved by SDS-PAGE and subjected to Western blotting with polyclonal Ppn1 antibodies. The positions and sizes (in kilodaltons) of marker polypeptides are indicated at left.
