# Supplementary material for: Structure-function analysis of fission yeast cleavage and polyadenylation factor (CPF) subunit Ppn1 and its interactions with Dis2 and Swd22
Source: PubMed Central journal article supplement (PMC7990198; doi:10.1371/journal.pgen.1009452), 2021-03-12
Supplement: pgen.1009452.s006.pdf [file pgen.1009452.s006.pdf]

**N-terminal truncations**

|                   | <i>ppn1Δ</i> | 173-710 | 331-710 | 386-710 | 451-710   | 488-710   |
|-------------------|--------------|---------|---------|---------|-----------|-----------|
| <i>ctf1Δ</i>      | Lethal       |         | cs      | cs      | very sick | Lethal    |
| <i>rhn1Δ</i>      | Lethal       |         |         | ts      | ts        | ts        |
| <i>ssu72-C13S</i> | Lethal       |         | ts      | ts      | Lethal    | Lethal    |
| <i>pin1Δ</i>      | Lethal       |         | sick    | sick    | very sick | Lethal    |
| <i>CTD-Y1F</i>    | Lethal       |         | sick    | sick    | very sick | very sick |
| <i>CTD-S2A</i>    | Lethal       |         | sick    | sick    | sick      | very sick |
| <i>CTD-T4A</i>    | Lethal       |         | cs      | cs      | sick      | very sick |

**C-terminal truncations**

|                   | <i>ppn1Δ</i> | 1-639     | 1-606     | 1-593     | 1-532  | 1-496  |
|-------------------|--------------|-----------|-----------|-----------|--------|--------|
| <i>ctf1Δ</i>      | Lethal       | cs/ts     | cs/ts     | ts        | Lethal | Lethal |
| <i>rhn1Δ</i>      | Lethal       | ts        | ts        | ts        | Lethal | Lethal |
| <i>ssu72-C13S</i> | Lethal       | sick      | sick      | very sick | Lethal | Lethal |
| <i>pin1Δ</i>      | Lethal       | ts        | ts        | ts        | Lethal | Lethal |
| <i>CTD-Y1F</i>    | Lethal       | very sick | very sick | very sick | Lethal | Lethal |
| <i>CTD-S2A</i>    | Lethal       | cs/ts     | cs/ts     | sick      | Lethal | Lethal |
| <i>CTD-T4A</i>    | Lethal       | ts        | ts        | cs/ts     | Lethal | Lethal |

**N/C-terminal truncations**

|                   | <i>ppn1Δ</i> | 173-639 | 331-639 | 386-593 | 173-532   | 386-532   |
|-------------------|--------------|---------|---------|---------|-----------|-----------|
| <i>ctf1Δ</i>      | Lethal       |         | cs      |         | cs, ts    | cs        |
| <i>rhn1Δ</i>      | Lethal       |         |         |         | ts        | ts        |
| <i>ssu72-C13S</i> | Lethal       |         |         |         | Lethal    | very sick |
| <i>pin1Δ</i>      | Lethal       |         |         |         | Lethal    | very sick |
| <i>CTD-Y1F</i>    | Lethal       |         | cs      | cs      | very sick | sick      |
| <i>CTD-S2A</i>    | Lethal       |         | cs      | cs      | sick      | cs        |
| <i>CTD-T4A</i>    | Lethal       |         | cs      | cs      | very sick | very sick |

S6 Fig. Summary of growth effects of *ppn1* truncations in different genetic backgrounds. *ppn1* mutants specified in the top rows were crossed to the mutant strains specified in the left-most column. Synthetically lethal pairs of alleles are highlighted in red boxes. The yellow boxes indicate synthetic growth defects (sick or very sick). Viable double mutants without a synthetic defect are indicated by a plain green box. Viable double mutants that displayed temperature-sensitive (*ts*) or cold-sensitive (*cs*) defects are annotated as such in its green box.
