# Supplementary material for: Structure-function analysis of fission yeast cleavage and polyadenylation factor (CPF) subunit Ppn1 and its interactions with Dis2 and Swd22
Source: PubMed Central journal article supplement (PMC7990198; doi:10.1371/journal.pgen.1009452), 2021-03-12
Supplement: pgen.1009452.s008.pdf [file pgen.1009452.s008.pdf]

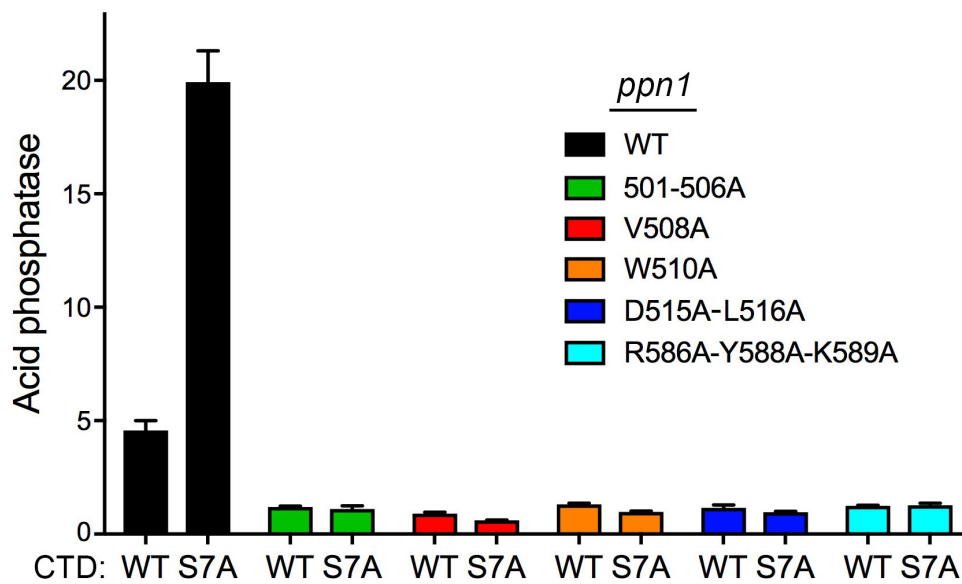

S8 Fig. Ppn1 mutations defective for Dis2 or Swd22 binding hyper-repress Pho1 expression. *S. pombe* CTD-WT or CTD-S7A strains bearing the indicated *ppn1* alleles were grown in liquid culture at 30°C and assayed for acid phosphatase activity.
