# Supplementary material for: Structure-function analysis of fission yeast cleavage and polyadenylation factor (CPF) subunit Ppn1 and its interactions with Dis2 and Swd22
Source: PubMed Central journal article supplement (PMC7990198; doi:10.1371/journal.pgen.1009452), 2021-03-12
Supplement: pgen.1009452.s009.pdf [file pgen.1009452.s009.pdf]

| <b>BD-Dis2</b> | <b>AD-Ppn1</b> |
|----------------|----------------|
| I168A          | --             |
| Y254A          | ±±             |
| F256A          | --             |
| R260A          | ±±             |
| C290A          | ++             |
| F292A          | --             |
| D165A          | ++             |
| D239A          | ++             |
| D165A-D239A    | ++             |
| ΔC             | ++             |

S9 Fig. Dis2 mutations that affect interaction with Ppn1. Gal4 BD fusions to full-length Dis2 alanine mutants and the C-terminal deletion mutant Dis2-(1-304) were tested for 2-hybrid interactions with full-length Ppn1 fused to the Gal4 AD. BD/AD pairs that scored positive in both reporter assays (LacZ expression and histidine prototrophy) are indicated as ++. Pairs that were negative in both reporter assays are scored as --. Weakly positive pairs are scored as ±±.
